# Supplementary material for: A turn-on fluorescent probe for hypochlorous acid based on HOCl-promoted removal of the CN bond in BODIPY-hydrazone
Source: Royal Society of Chemistry journal article supplement (doi:10.1039/c5nj01083g), 2015-01-01
Supplement: c5nj01083g1.pdf [file c5nj01083g1.pdf]

Supporting information for

**A turn-on fluorescent probe for hypochlorous acid based on HOCl-promoted removal of the C=N bond in BODIPY-hydrazone**

Wei-Chieh Chen<sup>a</sup>, Parthiban Venkatesan<sup>a</sup>, Shu-Pao Wu\*

*Department of Applied Chemistry, National Chiao Tung University, Hsinchu, Taiwan  
300, Republic of China*

Tel.: +886-3-5712121-ext56506

Fax: +886-3-5723764

E-mail: spwu@mail.nctu.edu.tw

**Contents**

1. Figure S1. <sup>1</sup>H NMR (500 MHz, CDCl<sub>3</sub>) spectrum of **BODH**
2. Figure S2. <sup>13</sup>C NMR (125 MHz, CDCl<sub>3</sub>) spectrum of **BODH**
3. Figure S3. HR-EI MS spectrum of BODH
4. Figure S4. HR-EI MS spectrum of BODIPY-Al
5. Figure S5. The relationship with time of fluorescence enhancement of BODH in a H<sub>2</sub>O-MeOH (v/v = 70/30, 70 mM PBS, pH7.4) solution upon adding NaOCl (25 μM, 5 eq). The excitation wavelength was 470 nm
6. Figure S6. Fluorescence spectra of BODIPY-Al (5 μM) in a H<sub>2</sub>O-MeOH (v/v = 70/30, 70 mM PBS, pH7.4) solution.
7. Figure S7. Calibration curve of BODH–NaOCl in a H<sub>2</sub>O-MeOH (v/v = 30/70, 70 mM PBS, pH = 7.4) solution.
8. Figure S8. Reversed-phase HPLC chromatograms of **BODH** (100 μM) with NaOCl (5000 μM, 5eq) in a H<sub>2</sub>O-MeOH

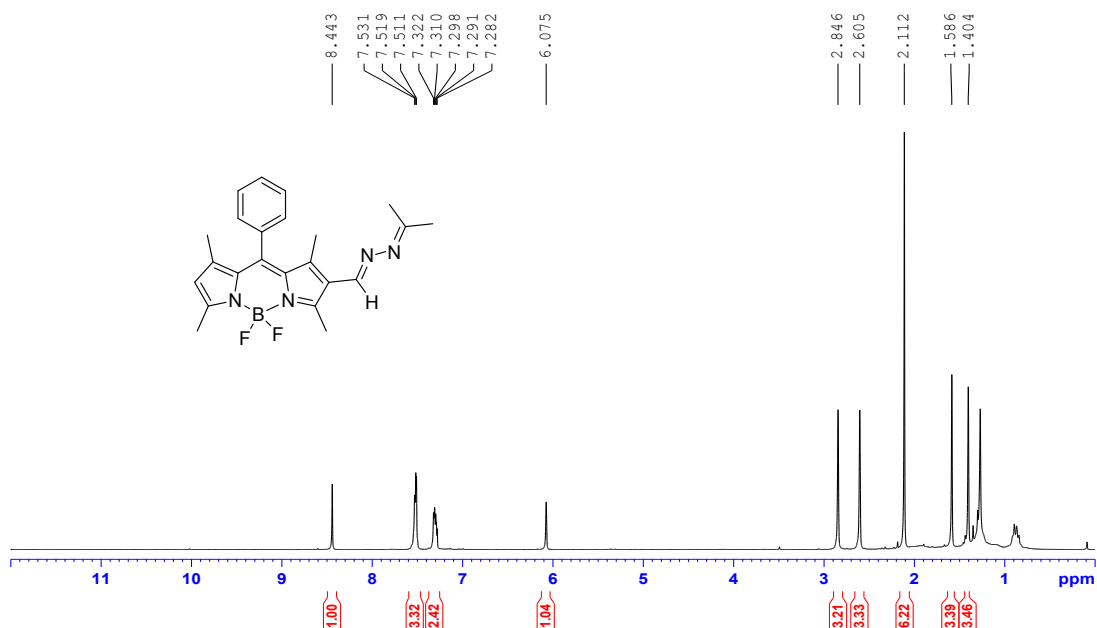

Figure S1. <sup>1</sup>H NMR (300 MHz, CDCl<sub>3</sub>) spectrum of **BODH**

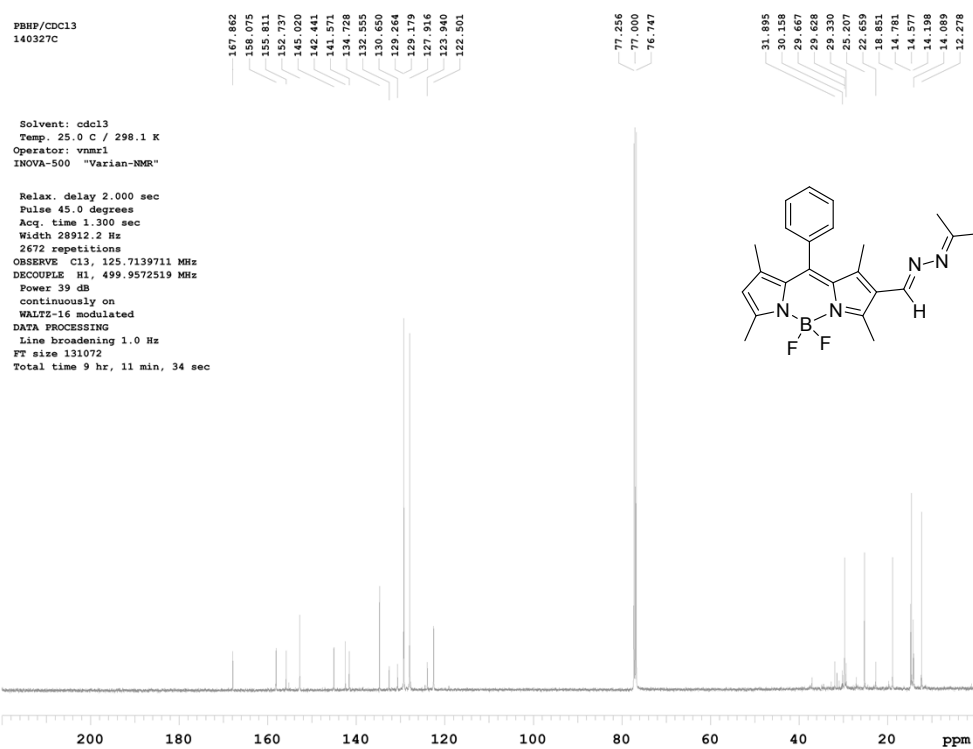

Figure S2. <sup>13</sup>C NMR (125 MHz, CDCl<sub>3</sub>) spectrum of **BODH**.

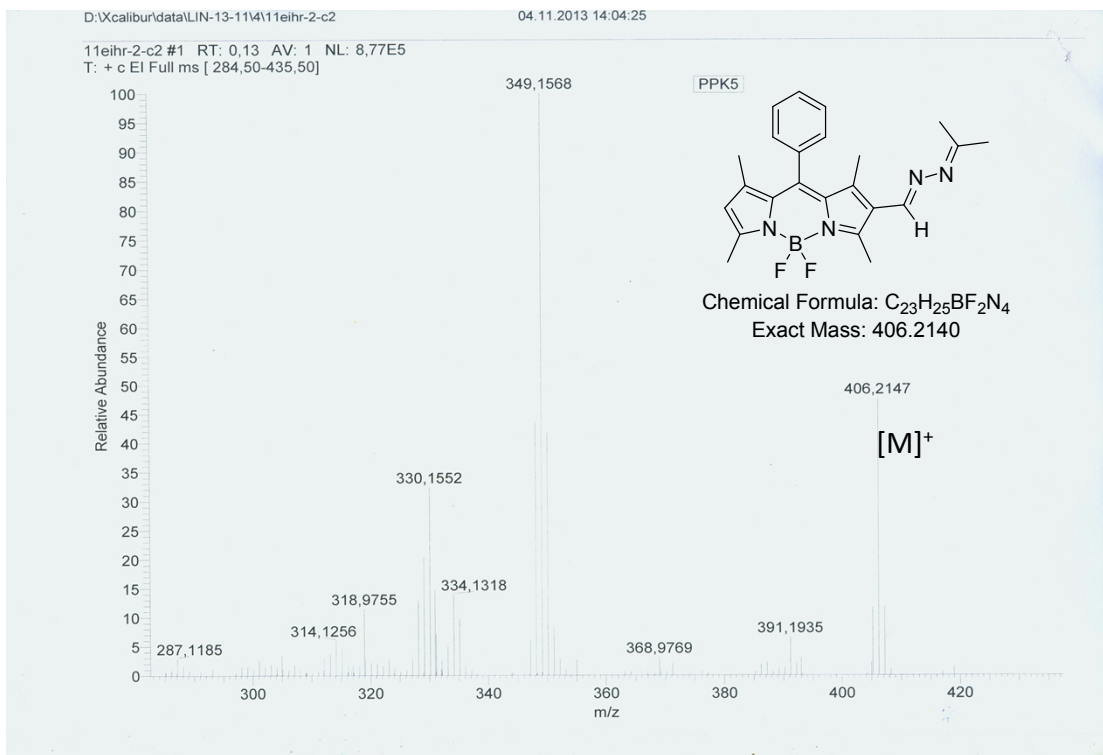

Figure S3. HR-EI MS spectrum of BODH

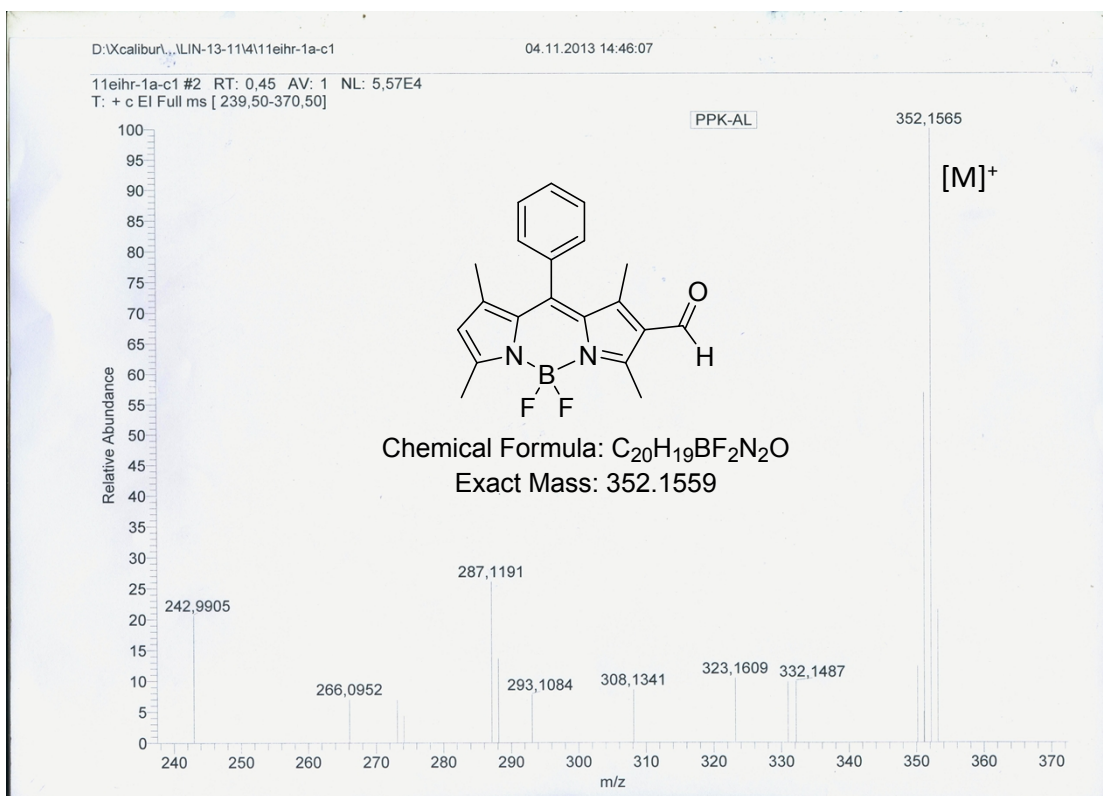

Figure S4. HR-EI MS spectrum of BODIPY-AL

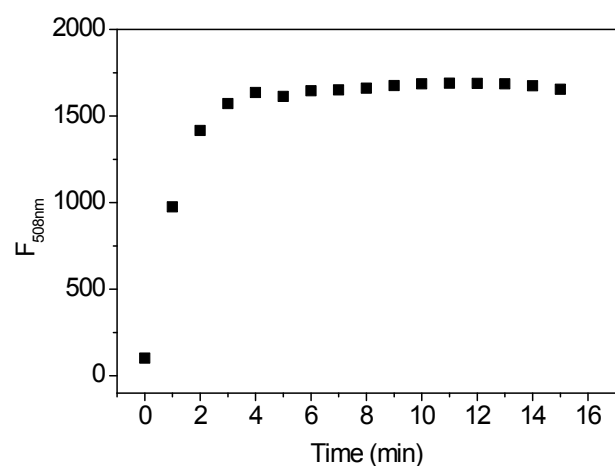

Figure S5. The relationship with time of fluorescence enhancement of BODH in a H<sub>2</sub>O-MeOH (v/v = 70/30, 70 mM PBS, pH7.4) solution upon adding NaOCl (25 μM, 5 eq). The excitation wavelength was 470 nm

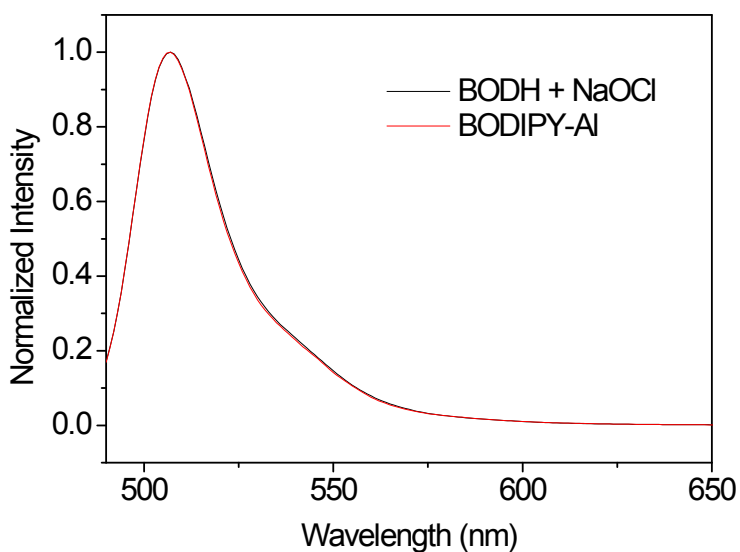

Figure S6. Fluorescence spectra of BODIPY-AI (5 μM) in a H<sub>2</sub>O-MeOH (v/v = 70/30, 70 mM PBS, pH7.4) solution.

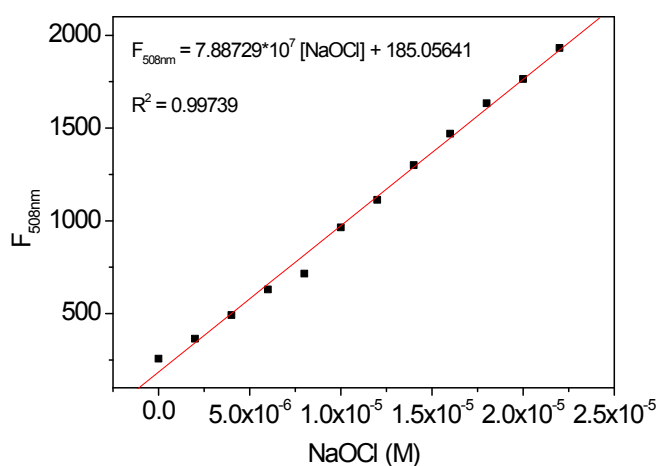

Figure S7. Calibration curve of BODH–NaOCl in a H<sub>2</sub>O–MeOH (v/v = 30/70, 70 mM PBS, pH = 7.4) solution. The excitation wavelength was 470 nm and the monitored emission wavelength was 508 nm. The detection limit (DL) of NaOCl using BODH was determined from the following equation:  $DL = K \times SD / S$ , where  $K = 3$ ; SD is the standard deviation of the blank solution; S is the slope of the calibration curve.  $DL = K \times SD/S = 3 \times 5.399 / (7.88729 \times 10^7) = 2.05 \times 10^{-7}$  (M).

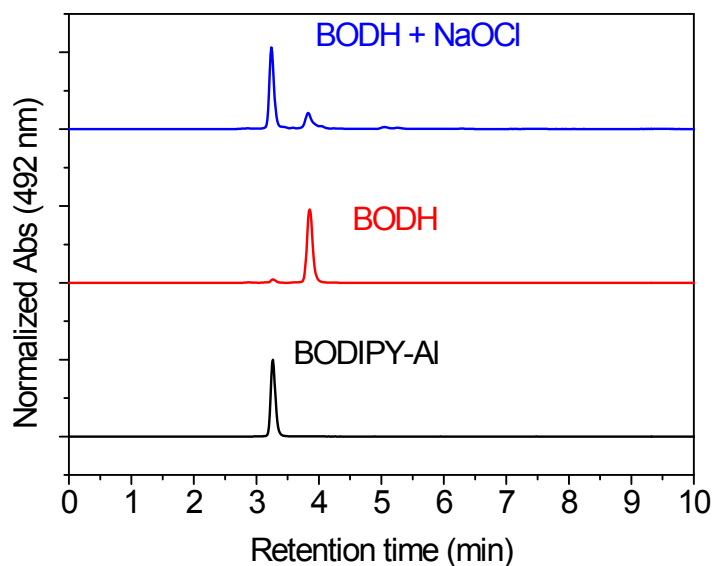

Figure S8. Reversed-phase HPLC chromatograms of **BODH** (100 μM) with NaOCl (5000 μM, 5eq) in a H<sub>2</sub>O–MeOH.
